# Supplementary material for: Circadian Rhythms of Fetal Liver Transcription Persist in the Absence of Canonical Circadian Clock Gene Expression Rhythms In Vivo
Source: PLoS One. 2012 Feb 23;7(2):e30781. doi: 10.1371/journal.pone.0030781 (PMC3285613; doi:10.1371/journal.pone.0030781)
Supplement: Table S4 — Expression values of pancreatic exocrine enzymes-related probe sets in fetal liver. (XLS) [file pone.0030781.s011.xls]

## Sheet: Fetal-CV-filtering
Probe.Set.ID	Representative.Public.ID	Gene.Symbol	CV-S1	CV-S2
1419294_at	NM_025956	1700011H14Rik	0.96155	0.55811
1452417_x_at	AV057155	2010205A11Rik /// Gm10883 /// Gm1420 /// Gm7202 /// Igk /// Igk-C /// Igk-J1 /// Igk-V28 /// LOC100047628	0.57734	0.804138
1422434_a_at	AK008695	2210010C04Rik	1.0581	1.46117
1422435_at	AK008695	2210010C04Rik	0.715002	1.14034
1451441_at	BC026828	2210415F13Rik	1.99323	1.85739
1425102_a_at	AB053181	Ace2	1.58186	0.50337
1428803_at	AK014558	Acot6	0.765289	0.501378
1419476_at	NM_021475	Adamdec1	1.67055	0.627978
1423556_at	AV021656	Akr1b7	0.509803	0.866514
1419136_at	NM_134066	Akr1c18	0.864013	0.888828
1417085_at	NM_030611	Akr1c6	0.515953	0.761779
1416055_at	NM_009669	Amy2a2 /// Amy2a5	0.8758	1.26298
1453307_a_at	AK003821	Anapc5	0.616992	0.626121
1425677_a_at	M84756	Ank1	0.60009	0.521471
1417761_at	BC010769	Apoa4	1.64117	1.68824
1436504_x_at	AV027367	Apoa4	1.62632	1.73464
1417610_at	NM_080434	Apoa5	0.690957	1.47703
1418278_at	BC021776	Apoc3	0.514831	1.01931
1424011_at	BC024105	Aqp9	0.519183	0.648573
1421944_a_at	U09362	Asgr1	0.531627	0.790907
1451681_at	BC018263	BC089597	0.622418	0.578228
1419528_at	NM_009286	C730007P19Rik	1.13457	0.92311
1422815_at	NM_013485	C9	0.823422	0.576333
1424713_at	AY061807	Calml4	0.748213	0.614076
1449434_at	NM_007606	Car3	0.804675	0.668283
1460256_at	NM_007606	Car3	1.01887	0.825065
1417257_at	BC006872	Cel	1.31936	1.75883
1448281_a_at	NM_007919	Cela2a	1.27717	1.70613
1415883_a_at	NM_026419	Cela3b	1.68858	1.87374
1415884_at	NM_026419	Cela3b	1.70505	1.91363
1435611_x_at	BI439657	Cela3b	1.30791	1.78096
1435012_x_at	BI439550	Cela3b /// Gm13011 /// LOC638418	1.2745	1.73804
1437326_x_at	AV060902	Cela3b /// LOC638418	1.27307	1.73232
1449031_at	U65091	Cited1	1.4639	0.656956
1417089_a_at	NM_009897	Ckmt1	1.62401	0.576295
1417231_at	NM_016675	Cldn2	0.556677	0.608919
1420804_s_at	NM_010819	Clec4d	0.526165	0.632302
1415805_at	NM_025469	Clps	1.39303	1.67487
1438612_a_at	AV076302	Clps	1.28268	1.58542
1428062_at	AK003088	Cpa1	1.6898	1.6684
1454623_at	BG141511	Cpa2	1.77897	1.72206
1428102_at	AK003061	Cpb1	1.48427	1.66827
1448220_at	NM_025583	Ctrb1	1.37644	1.58761
1431763_a_at	AK003074	Ctrl	0.826451	1.96975
1418930_at	NM_021274	Cxcl10	0.559554	0.50189
1418652_at	NM_008599	Cxcl9	0.596456	0.577711
1419094_at	NM_010001	Cyp2c37	0.711034	1.34143
1419349_a_at	BC010593	Cyp2d9	0.566124	0.860933
1415994_at	NM_021282	Cyp2e1	0.593927	1.17717
1448792_a_at	NM_007817	Cyp2f2	0.539544	0.857702
1417531_at	BF783609	Cyp2j5	0.589409	1.08908
1417532_at	BF783609	Cyp2j5	0.664264	1.00158
1424973_at	AF204959	Cyp3a25 /// LOC100044443	0.807394	1.40527
1419704_at	NM_017396	Cyp3a41a /// Cyp3a41b	0.838105	1.30617
1424853_s_at	BC010747	Cyp4a10 /// Cyp4a31	0.600263	1.08857
1424352_at	BC025936	Cyp4a12a	0.511082	0.570349
1423257_at	AI327006	Cyp4a14	0.671078	1.22045
1438743_at	BB667338	Cyp7a1	0.556131	0.604273
1418028_at	NM_010024	Dct	0.573844	1.17705
1418287_a_at	NM_007769	Dmbt1	2.0866	0.696528
1418511_at	NM_019759	Dpt	0.513867	0.902119
1454737_at	AV295798	Dusp9	0.721615	0.608834
1433845_x_at	AV295798	Dusp9	0.758224	0.589763
1422682_s_at	NM_053243	EG436523 /// Gm10334 /// Prss1 /// Prss3	1.46557	1.68267
1424932_at	U03425	Egfr	0.539207	0.665326
1416444_at	NM_019423	Elovl2	0.510797	0.694568
1416579_a_at	BC005618	Epcam	1.15303	0.668827
1451600_s_at	BC019147	Es31 /// Gm4738	0.679601	1.15042
1418438_at	NM_007980	Fabp2	1.83009	1.8258
1424599_at	BC021946	Fgl1	0.544838	0.796747
1437218_at	BM234360	Fn1	0.506691	0.816208
1423100_at	AV026617	Fos	0.570378	0.565457
1417880_at	NM_008061	G6pc	0.832187	1.49973
1427660_x_at	BC013496	Gm10883 /// Gm1420 /// Gm7202 /// Igk /// Igk-C /// Igk-J1 /// Igk-V28 /// LOC100047628	0.570114	0.838385
1427455_x_at	BI107286	Gm10883 /// Gm1420 /// Gm7202 /// Igk /// Igk-C /// Igk-J1 /// Igk-V28 /// LOC100047628	0.587422	0.834128
1453939_x_at	AK019325	Gm9706	0.522946	0.544274
1431591_s_at	AK019325	Gm9706 /// Isg15	0.551191	0.838093
1421040_a_at	NM_008182	Gsta2	1.6871	0.55484
1419196_at	NM_032541	Hamp	0.757075	0.577415
1419197_x_at	NM_032541	Hamp	0.767667	0.53778
1437810_a_at	AV311770	Hbb-bh1	1.18135	0.77905
1450736_a_at	NM_008219	Hbb-bh1	1.2895	0.659903
1437990_x_at	AV147727	Hbb-bh1	1.13285	0.631764
1436717_x_at	AV156860	Hbb-y	1.0765	0.57773
1436823_x_at	AV148191	Hbb-y	1.08705	0.590829
1450621_a_at	NM_008221	Hbb-y	1.3073	0.583542
1449385_at	NM_013786	Hsd17b6	0.700489	1.31589
1423509_a_at	BM569571	Iapp	0.944243	1.53753
1437323_a_at	BB434117	Iapp	1.14299	1.63835
1426278_at	AY090098	Ifi27l2a	0.582432	0.947771
1450783_at	NM_008331	Ifit1	0.56522	0.93117
1454159_a_at	AK011784	Igfbp2	0.592969	1.04859
1419043_a_at	BM239828	Iigp1	0.661771	0.792972
1419042_at	BM239828	Iigp1	0.768398	0.84125
1449585_at	NM_134103	Il1rap	0.571723	0.901823
1422144_at	BC010404	Inhbe	0.70408	0.740505
1422446_x_at	NM_008387	Ins2	0.944645	1.62285
1417244_a_at	NM_016850	Irf7	0.59495	0.593861
1448107_x_at	BC010754	Klk1	1.16773	1.60617
1415837_at	BC010754	Klk1	1.02443	1.56323
1439479_at	C78577	Lct	1.96769	1.27896
1417078_at	NM_025622	Lgals2	1.63603	0.539656
1417079_s_at	NM_025622	Lgals2	1.77212	1.21384
1451336_at	BC021632	Lgals4	1.60762	1.34768
1421447_at	NM_008262	LOC100048479 /// Onecut1	0.502606	0.541616
1417290_at	NM_029796	Lrg1	0.522978	0.814673
1418787_at	NM_010776	Mbl2	0.527624	0.822512
1436713_s_at	BM119226	Meg3	0.510711	0.59245
1451612_at	BC027262	Mt1	0.59072	0.570507
1422580_at	NM_010858	Myl4	0.513993	0.560321
1425392_a_at	AF009328	Nr1i3	0.565219	0.511971
1424775_at	BC018470	Oas1a	0.538477	0.760324
1453196_a_at	BQ033138	Oasl2	0.542002	0.714561
1423439_at	AW106963	Pck1	1.20104	2.20236
1415777_at	NM_018874	Pnliprp1	1.20909	1.47149
1448186_at	NM_011128	Pnliprp2	1.03372	1.53225
1451361_a_at	BC027342	Pnpla7	0.542024	0.904301
1455996_x_at	AI415324	Prap1	1.77966	1.78476
1419167_at	NM_009475	Prap1	1.77325	1.60325
1425853_s_at	M22958	Prlr	0.539922	0.503784
1417682_a_at	NM_009430	Prss2	0.97789	1.91854
1435507_x_at	BI348639	Prss2	0.716142	1.79046
1433573_x_at	BI713841	Prss2	0.905037	1.88663
1433459_x_at	BI348548	Prss2	0.867962	1.70772
1450689_at	NM_011645	Prss3	1.22211	1.59268
1415905_at	NM_009042	Reg1	2.30238	1.17814
1417601_at	NM_015811	Rgs1	0.557123	0.510787
1426037_a_at	U94828	Rgs16	0.595994	0.574763
1428055_at	AB076245	Rian	0.562333	0.640848
1416523_at	NM_011271	Rnase1	1.33302	1.79479
1421008_at	BB741897	Rsad2	0.51821	0.683166
1425218_a_at	AF274959	Scgb3a2	0.714398	1.95761
1423866_at	BF234005	Serpina3k	0.620893	1.42161
1421921_at	BC011158	Serpina3m	0.755076	1.63798
1419100_at	NM_009252	Serpina3n	0.574791	0.905919
1448506_at	NM_007618	Serpina6	1.54186	0.98055
1419149_at	NM_008871	Serpine1	1.04397	0.996726
1425152_s_at	AF251276	Serpini2	1.60809	1.59457
1418639_at	NM_011359	Sftpc	3.20518	3.20602
1421602_at	NM_011367	Shbg	0.965703	0.597804
1425034_at	BC018306	Slc17a2	0.608724	0.515572
1449394_at	NM_020495	Slco1b2	0.649243	0.970535
1452494_s_at	AF250912	Slco1b2	0.568306	0.959608
1427102_at	AF099975	Slfn4	0.709425	0.83318
1418507_s_at	NM_007706	Socs2	0.523725	0.663355
1418940_at	NM_019878	Sult1b1	1.2684	0.685544
1448973_at	NM_016771	Sult1d1	0.514271	0.63874
1418138_at	NM_016771	Sult1d1	0.541592	0.588853
1421669_at	NM_020565	Sult3a1	0.795126	0.891405
1434803_a_at	AV050299	Sycn	0.679384	1.86445
1451228_a_at	BC019567	Sycn	0.721969	1.54791
1422188_s_at	NM_011558	Tcrg-V2 /// Tcrg-V3	0.670964	0.95569
1450521_a_at	NM_011558	Tcrg-V4	0.572046	1.05297
1422189_x_at	NM_011558	Tcrg-V4	0.688952	1.29142
1422967_a_at	BB810450	Tfrc	0.633323	0.600443
1449009_at	NM_011579	Tgtp1 /// Tgtp2	0.504596	0.812049
1422973_a_at	NM_009381	Thrsp	0.635951	0.676795
1424737_at	BC009165	Thrsp	0.806965	1.28693
1419314_at	BC010745	Tinag	0.945394	0.524914
1416490_at	NM_025458	Tmed6	0.88114	1.18363
1418370_at	NM_009393	Tnnc1	1.2183	0.791355
1415954_at	AB009661	Try4 /// Try5	1.08889	1.90161
1427263_at	L04961	Xist	0.606433	0.570745
1428358_at	BF581690	Zg16	0.52037	1.55846
1428359_s_at	BF581690	Zg16	1.23717	1.89611
1434137_x_at	BI792151	Zg16	1.00223	1.74216

## Sheet: S1-Pancreatic
Probe.Set.ID	Representative.Public.ID	Gene.Symbol	E18CT2	E18CT6	E18CT10	E18CT14	E18CT18	E18CT22	E19CT2	E19CT6	E19CT10	E19CT14	E19CT18	E19CT22
1416055_at	NM_009669	Amy2a2 /// Amy2a5	8754.9	35283.5	12712.6	11807.4	8460.4	26115	14242.3	7075.7	7671.8	74390.9	27909.3	28611.7
1417257_at	BC006872	Cel	281.1	1294.7	74	104.6	35.8	819.1	402.3	52	32.5	2769.8	520.1	814.8
1448281_a_at	NM_007919	Cela2a	691.6	4896.5	287.9	603	44.6	3000.3	1420.1	261.7	57.6	9731.5	3204.8	2337
1415884_at	NM_026419	Cela3b	156.7	1123.1	61.9	53.3	20.9	429.2	259.6	45.9	26.7	3081.5	431.2	421.3
1415883_a_at	NM_026419	Cela3b	109.3	1232.9	30.5	74.9	10.6	531.6	266.1	34.6	13.6	2956.8	414.8	348.8
1435611_x_at	BI439657	Cela3b	319.8	2024.9	147.8	326.4	41.4	1360.6	724.9	124.7	68.2	4407.5	1086.3	801.4
1435012_x_at	BI439550	Cela3b /// Gm13011 /// LOC638418	439.4	2914.7	248.7	417	28.3	2636.6	1057.7	219	63.5	6266.1	1558.6	1176
1437326_x_at	AV060902	Cela3b /// LOC638418	412.9	2966.8	191.6	418.3	27.8	2403.8	1092.8	183.8	59.3	5937.7	1505.4	1076.2
1415805_at	NM_025469	Clps	412.1	3300.1	217.8	322.8	49.3	1778.6	1186.8	236.2	41.9	7288.6	1588.2	1380.8
1438612_a_at	AV076302	Clps	1057.9	9532	463.9	1069.1	149.2	6433.6	3253.4	590.3	109.3	17072.8	3957.9	3472.6
1428062_at	AK003088	Cpa1	219.9	1525	88.7	116.1	27.8	582.5	373.8	86.5	51.8	4100.9	596.5	424.1
1454623_at	BG141511	Cpa2	30.6	397.6	27.6	28.2	27.4	91.8	31.9	26.8	27	957.4	110.8	90.1
1428102_at	AK003061	Cpb1	169.8	1487.3	71.6	200.8	12.1	937.2	273.4	53.7	13.6	3562.4	758.2	668.7
1448220_at	NM_025583	Ctrb1	1127.5	7629.4	480.1	755	18	4801.2	2561.5	349.1	64.4	17523.7	4724.8	3456.6
1431763_a_at	AK003074	Ctrl	22.7	61.8	22.1	23.5	23.5	41.2	27.9	27.4	21.4	144.7	65.7	33.4
1415777_at	NM_018874	Pnliprp1	2018	7354.6	1100.8	1093.4	374.5	3685.1	2324.3	897.3	448.5	14300.1	3054.6	2684.1
1448186_at	NM_011128	Pnliprp2	80.3	84.6	65.7	64.9	66.5	70.4	44.6	66.6	61.2	408.1	67.8	67.1
1433573_x_at	BI713841	Prss2	179.5	418.5	35.6	49.4	36	597.7	504.5	35.6	35.5	844.1	501	536.6
1433459_x_at	BI348548	Prss2	418.3	740.1	34.8	209.7	34.1	1375.7	887.3	39.9	32.8	1018.6	870.9	821.7
1435507_x_at	BI348639	Prss2	279.2	528.8	171.8	178.2	100	1105.9	653.3	171.9	151.9	807.3	592.6	596.2
1417682_a_at	NM_009430	Prss2	116.4	413.9	33.9	52.3	32.7	468.1	261.5	39.6	26.7	810.1	365.2	420.3
1434803_a_at	AV050299	Sycn	77.6	148.7	81.8	129.2	103.3	249.7	170.3	95.9	104.2	487.6	270.2	147.1
1415954_at	AB009661	Try4 /// Try5	114.8	858.8	45.1	109.6	32.1	790.6	319.8	48.7	32.3	1524.6	689	627.2
1434137_x_at	BI792151	Zg16	34.5	302.7	24.5	40.2	23.1	296	100.7	22.1	20.3	437.4	201.9	214
1428359_s_at	BF581690	Zg16	45.3	265.8	30.1	47	30.9	222.6	59.8	30.5	30.3	704.6	201.7	229.8
1428358_at	BF581690	Zg16	33.2	42.6	32	44.2	37	42.5	49.4	33.4	33.9	118.2	41.4	82

## Sheet: S2-Pancreatic
Probe.Set.ID	Representative.Public.ID	Gene.Symbol	E18.CT2	E18.CT6	E18.CT10	E18.CT14	E18.CT18	E18.CT22	E19.CT2	E19.CT6	E19.CT10	E19.CT14	E19.CT18	E19.CT22
1416055_at	NM_009669	Amy2a2 /// Amy2a5	85203.3	60924.8	2538.5	4045	6107.8	20191.3	53910.1	168667	26484.6	10443	16148.4	8049.1
1417257_at	BC006872	Cel	4368.4	2142.4	93.4	96.5	93.2	314.5	2032.5	10415.9	496.6	153.8	394.9	89.7
1448281_a_at	NM_007919	Cela2a	15375	8155.1	71.4	148.4	283	1447.8	9012.7	36942.3	2312.7	862.9	1166.1	68.5
1415883_a_at	NM_026419	Cela3b	3928.5	1616.4	23.2	22.7	34.9	301.5	1402.1	9228.3	341	112.6	287.9	23.1
1415884_at	NM_026419	Cela3b	3710.5	1664.7	56.2	56.8	60.4	266.3	1450.7	9587.6	309.4	65.5	191.5	48.6
1435611_x_at	BI439657	Cela3b	5840.1	2460.5	94.9	81.7	106.9	580.4	2421.5	13827.1	650.1	154.4	770.7	82.3
1435012_x_at	BI439550	Cela3b /// Gm13011 /// LOC638418	5804.7	2442.7	50.3	59.5	85	581.9	2622.3	13547	765.3	224.2	943.3	48.3
1437326_x_at	AV060902	Cela3b /// LOC638418	10043	3840	82	77.5	129.8	979.9	3913.9	21143.7	1177.8	296.3	1442.5	43.8
1415805_at	NM_025469	Clps	11429.7	5177	44.6	160	215.5	900.3	5146.2	22986.7	1506.7	326.9	1144	41.3
1438612_a_at	AV076302	Clps	27654.2	11814.8	76.3	147.7	382	2466.2	11500.2	48333.9	3467.1	753.7	4671.6	74.8
1428062_at	AK003088	Cpa1	5252.2	3001.6	53.4	107.1	155.8	605	2435.6	11549.2	507.8	162.7	577	43
1454623_at	BG141511	Cpa2	1476	605.3	58.4	46.4	57.3	61	375.8	2590	69.5	56.4	60.8	57.3
1428102_at	AK003061	Cpb1	5165	2022.3	28	41.8	50.4	477.7	2333.8	9634.4	648.5	156.2	360.4	28.1
1448220_at	NM_025583	Ctrb1	21048.6	9184.2	33.7	112.2	224.2	1775.9	6970.6	30803.1	1896.1	577.3	1959.6	27.5
1431763_a_at	AK003074	Ctrl	383.2	116.2	50.4	49.4	50.5	49.9	304.6	1785.2	79.8	49.9	50.9	50.4
1415777_at	NM_018874	Pnliprp1	28741.5	15568.6	347.2	833.1	1100.8	3199.9	11905.2	46179.9	3576	1261.4	3661.5	244.9
1448186_at	NM_011128	Pnliprp2	489.8	193	73	85.1	64.7	103.4	201.5	1326	103.8	61.1	86.7	58.8
1417682_a_at	NM_009430	Prss2	851.7	489.5	85.1	64	64.5	106	656.6	3703.7	181.9	92.3	96.8	64.5
1435507_x_at	BI348639	Prss2	1525.3	658.3	93.7	60.5	60.9	348.7	1127.8	5606	380.2	155.3	379.3	64.4
1433573_x_at	BI713841	Prss2	1400.1	410.9	84.5	79.4	84.5	182.4	788.9	4670.3	238.4	138.7	181.5	84.6
1433459_x_at	BI348548	Prss2	1780	709.8	71.5	63.1	82.5	462	1402.2	6861.9	545.8	203.1	1096	65.1
1434803_a_at	AV050299	Sycn	981.6	295.4	180	110.5	92.1	175.9	606.3	4140.7	196.7	175.6	273.7	113.3
1415954_at	AB009661	Try4 /// Try5	2240.2	1234	45.4	35.3	72.4	191.6	870.8	6902.3	431.5	131.7	201.6	37.1
1428358_at	BF581690	Zg16	326.7	134.3	76.4	69.8	65.8	76.6	172.3	1141.3	82	75.1	74.7	67.3
1428359_s_at	BF581690	Zg16	1352.6	606.6	54.5	49.7	58.9	102.1	763.6	4231.5	175.1	67	101.5	51.1
1434137_x_at	BI792151	Zg16	1125	465.8	42.4	46.1	50	154.7	642.3	3321.9	208.9	76.9	262.6	45.7
