# Supplementary material for: Circadian Rhythms of Fetal Liver Transcription Persist in the Absence of Canonical Circadian Clock Gene Expression Rhythms In Vivo
Source: PLoS One. 2012 Feb 23;7(2):e30781. doi: 10.1371/journal.pone.0030781 (PMC3285613; doi:10.1371/journal.pone.0030781)
Supplement: Table S5 — Expression values of pancreatic exocrine enzymes-related probe sets in adult mouse livers. Adult WT mouse liver data were from GSE11923. Expression values spiked at around CT25 and CT46 for pancreatic exocrine enzymes-related probe sets (corresponding to Figure S5 heatmap). Data in GSE13093 were based on calculations for mice of different genotypes and under different feeding conditions (see Figure S5 legend for details of groupings). (XLS) [file pone.0030781.s012.xls]

## Sheet: WT-Adlib
Probe.Set.ID	Gene.Symbol	GSM301348	GSM301349	GSM301350	GSM301351	GSM301352	GSM301353	GSM301354	GSM301355	GSM301356	GSM301357	GSM301358	GSM301359	GSM301360	GSM301361	GSM301362	GSM301363	GSM301364	GSM301365	GSM301366	GSM301367	GSM301368	GSM301369	GSM301370	GSM301371	GSM301372	GSM301373	GSM301374	GSM301375	GSM301376	GSM301377	GSM301378	GSM301379	GSM301380	GSM301381	GSM301382	GSM301383	GSM301384	GSM301385	GSM301386	GSM301387	GSM301388	GSM301389	GSM301390	GSM301391	GSM301392	GSM301393	GSM301394	GSM301395
1416055_at	Amy2a2 /// Amy2a5	90.3912	91.6896	101.882	93.0445	90.5026	90.5702	87.9359	569048	430.109	123.851	94.3389	101.857	98.7158	93.6009	87.2842	95.149	104.851	94.5795	95.8951	94.192	101.315	99.9177	100.046	99.7181	93.4934	98.1716	108.003	99.6335	274153	108.44	96.8318	95.7951	94.7976	97.0808	94.994	95.7974	88.4898	96.9434	94.5333	97.4345	101.054	94.8701	100.467	118.795	134.806	111.34	112.323	145.839
1417257_at	Cel	68.4714	69.0815	68.6203	68.9791	67.2302	68.7316	68.1069	24425.9	67.8142	66.5876	79.9268	68.8788	69.7462	68.8067	68.4746	70.3254	69.4961	68.9281	68.904	69.1617	68.948	70.171	70.1589	71.1323	69.6883	70.9565	69.3087	69.8999	1761.62	70.708	69.4938	69.8613	69.3382	69.6722	69.4282	68.6853	68.243	69.566	69.1233	70.2372	70.1545	69.6203	70.3422	72.1246	71.9099	71.9734	72.7162	72.9209
1448281_a_at	Cela2a	72.0047	76.7198	96.5381	78.5261	156.543	72.3057	87.8335	98098	133.611	74.5683	79.7197	83.4174	101.235	83.2913	76.189	79.4649	80.5862	107.194	80.4535	73.0535	73.4508	77.4563	76.6095	82.5293	81.2368	81.2755	90.6646	96.7615	37953.2	120.965	85.003	87.7259	73.3097	91.3477	75.734	80.8401	83.3565	145.631	89.0527	97.3821	104.897	158.335	73.5949	86.8452	76.7065	85.8089	120.709	95.9752
1415883_a_at	Cela3b	42.7118	42.8318	42.8177	42.9043	42.1293	42.7927	42.538	21392.3	42.0607	42.4379	42.8388	42.9418	43.325	42.8086	43.3706	43.486	43.1615	42.8957	42.8205	42.9873	42.9558	43.9779	44.0382	43.8285	43.2344	43.4824	43.0612	43.4813	6968.68	43.7583	43.1502	43.4006	43.1016	43.2352	43.1574	43.0543	42.575	43.2988	42.8083	43.5085	43.4909	43.2631	43.5786	44.1049	43.9476	44.1214	44.1719	44.4413
1415884_at	Cela3b	243.014	245.773	240.266	250.502	237.204	250.13	242.713	11565.4	245.273	231.033	241.99	247.001	252.012	245.796	248.698	252.929	251.455	250.317	246.576	222.7	250.07	252.832	252.695	254.948	251.415	254.895	248.774	252.706	4810.63	258.479	306.863	252.778	247.044	251.87	251.066	247.252	242.048	251.796	250.294	303.475	252.782	252.137	258.584	263.91	262.846	258.321	268.429	386.24
1435611_x_at	Cela3b	84.1217	90.6802	89.8477	91.1019	83.9759	86.7359	89.7106	44393.7	101.183	89.049	94.8922	90.4659	91.3884	86.6899	86.0302	90.7751	91.0979	90.5326	90.3883	87.1144	88.2847	93.1315	91.8879	95.4997	90.9048	91.7698	90.5577	91.556	12338	92.2969	95.7053	91.5975	90.9662	91.2616	91.0305	90.4034	89.9592	91.3916	99.5414	91.5132	91.7879	90.662	96.3554	104.95	97.8648	92.9236	93.9491	93.3764
1435012_x_at	Cela3b /// Gm13011 /// LOC638418	83.4464	85.4059	84.5812	85.5751	78.6266	82.6213	83.3043	239910	161.553	82.9	85.383	86.3715	88.2773	84.2162	83.5391	88.9393	90.0906	85.9265	85.984	86.2515	86.2702	90.0488	89.3159	92.0901	87.9395	91.3734	87.3086	88.4054	85627.5	95.6481	87.3247	88.8842	86.0873	89.2169	87.9614	85.8073	83.1308	87.7602	85.4181	90.8272	89.5455	88.0612	94.1983	104.584	95.5542	98.8809	97.6974	101.513
1437326_x_at	Cela3b /// LOC638418	86.0817	88.4279	86.8795	87.7153	80.3108	86.2017	85.8886	223810	83.9535	82.8492	87.4749	88.8895	91.0668	87.1414	85.6284	91.2661	91.1036	87.8466	88.1504	87.7037	89.2244	91.6864	101.313	95.9715	91.2695	97.3869	89.7172	92.1038	76001.5	98.0512	89.5675	91.2297	88.3786	90.3459	90.8345	88.7039	86.0493	91.9294	88.4355	93.3914	92.3963	89.9838	104.958	99.8982	108.609	100.142	100.944	107.771
1415805_at	Clps	54.8748	55.6484	55.8317	56.0801	55.4025	55.9286	54.4595	30285	54.8891	55.6705	55.4379	55.9881	56.4669	56.0752	54.5575	56.7459	56.2738	55.4066	55.9483	56.1858	56.0995	56.7327	56.8378	57.6293	56.2764	56.6489	56.2661	56.5876	11041.1	57.6923	56.2009	56.6507	55.9138	56.4538	56.349	56.1649	54.6359	56.5376	56.1092	56.9752	56.6324	56.4866	57.4936	58.6368	57.9155	58.4692	58.7386	58.9025
1438612_a_at	Clps	69.713	70.2108	70.2572	71.7022	67.32	69.3589	68.3185	41893.3	66.844	68.5653	70.1867	72.1194	72.245	69.6224	68.5066	72.3477	72.0671	70.5483	71.4886	70.4202	70.7913	73.8259	72.4789	75.0048	71.6392	73.0057	71.5593	72.3772	16571.1	75.6005	71.286	72.6723	71.1512	73.7192	71.9778	70.5865	68.8645	72.0282	70.4755	72.5559	73.2079	72.0719	74.6558	78.2112	76.0058	76.7775	76.2209	78.572
1428062_at	Cpa1	54.8147	54.697	54.2544	54.8945	52.9365	54.4238	54.1356	40815.1	53.3364	53.5498	54.5205	54.7552	55.6245	54.7309	53.9583	55.7257	55.1805	54.6161	59.5144	54.761	54.9406	55.6842	56.0781	56.3451	55.3973	55.9016	56.0936	55.7822	10890.6	56.6926	68.3685	55.7237	54.9062	55.511	55.3146	55.0527	54.1078	55.295	54.6352	55.9664	55.6252	55.4951	56.3169	57.6185	58.4659	57.3302	57.2566	58.0946
1454623_at	Cpa2	52.8207	53.2172	52.9781	53.1508	51.7604	52.9693	52.2613	9285.89	51.4454	51.7942	53.0464	53.2491	54.0275	53.0556	52.5243	54.2568	53.9067	53.0945	53.1666	53.3965	53.4655	54.2404	54.4032	55.0888	53.8142	54.3705	53.477	54.0542	2056.76	55.1429	53.6759	54.2052	53.5997	53.984	53.6311	53.3448	52.7221	53.8367	53.1291	54.5205	54.4064	53.9748	55.3939	55.9654	55.2663	56.8301	55.9133	57.9767
1428102_at	Cpb1	56.2518	56.91	56.4901	56.9463	54.9263	56.7482	55.5574	99632.4	56.3491	55.1778	56.8357	57.4834	57.7795	57.3332	56.1535	58.1003	57.7702	56.7308	57.309	57.5925	57.5383	58.0665	58.1942	59.3415	57.5898	58.35	57.6487	57.9129	30864	59.2664	57.7107	58.0608	60.729	57.9199	57.7367	57.0058	56.4483	57.7663	57.5176	58.4121	58.1149	57.8875	58.8899	60.5526	59.4989	60.2686	60.4936	61.2239
1448220_at	Ctrb1	58.8068	59.3392	58.6591	59.2612	57.6994	59.0286	59.5411	44391.6	57.3487	57.8008	58.8677	59.134	60.6327	58.5946	58.2952	60.4556	59.991	59.7128	59.8109	59.9557	59.5011	60.3808	60.5361	61.2318	60.0643	60.494	60.0462	60.3748	7175.01	61.2058	60.0586	60.4105	60.0156	60.1455	59.7334	59.9773	58.5863	60.2336	59.2608	60.6479	60.6085	60.186	61.1247	62.1721	65.3608	62.5303	62.1436	63.4803
1431763_a_at	Ctrl	58.1408	66.4207	57.5737	57.8693	56.633	57.6797	57.2079	47911.6	56.5265	56.3358	57.774	57.7565	58.4216	57.5811	57.2132	58.6548	58.2451	57.7132	57.7484	57.9451	57.9778	67.4665	58.7212	59.9931	58.3381	58.9886	63.6403	58.5244	11158	59.7044	58.1995	71.2294	58.1173	54.868	56.5314	57.962	57.3915	58.5904	57.8549	58.7982	62.0868	58.3687	59.3572	60.0143	59.4694	60.3279	60.5203	59.9804
1433431_at	Pnlip	55.3494	55.6132	55.3309	55.4228	54.0242	55.2822	55.0934	126955	53.7542	54.6213	55.1711	55.3221	56.1083	55.3944	55.0001	56.278	55.8483	55.2382	55.2042	55.4489	55.4209	56.2743	56.4061	57.0462	55.8797	56.5825	55.5687	56.1706	32596.1	58.5369	57.2909	56.3543	55.5681	55.9443	55.8351	55.4352	54.7792	56.0259	55.4082	56.5209	56.2515	55.9765	56.3514	57.8448	57.2521	71.2588	57.8286	58.5149
1421868_a_at	Pnlip	68.8331	70.2135	69.5191	70.7674	67.0517	69.3124	67.9823	55597.1	66.5769	67.2662	69.9852	70.4613	71.7291	68.8808	67.6786	72.1045	72.0993	70.1322	70.2342	70.1511	70.5506	72.3825	72.3001	74.0193	71.3993	72.8165	70.9306	81.1176	9691.63	74.7626	88.0552	72.0844	70.7463	72.0299	71.1911	70.353	68.5657	71.5499	69.9842	72.6852	74.7756	71.5162	73.8361	77.0174	74.9716	75.8325	133.908	77.4285
1415777_at	Pnliprp1	71.1194	71.7906	71.589	71.6252	70.3059	71.4491	71.6518	15089.9	69.6964	70.1424	71.5656	71.5482	79.742	77.6495	70.5941	72.7518	72.3074	71.5627	71.642	71.5979	71.754	73.6894	72.8912	73.1955	72.1767	73.6423	72.0711	72.7047	4206.79	73.3879	72.2913	72.6293	70.9274	72.2193	72.0547	70.6816	71.1542	72.5399	71.6767	73.0855	72.9801	72.4153	75.562	74.5125	75.6778	76.647	74.6205	75.0828
1448186_at	Pnliprp2	69.3673	70.9561	70.2031	70.2791	67.1643	70.3922	69.5616	4079.84	66.6719	67.7297	71.9105	71.3258	72.971	70.4598	69.3542	72.9213	72.6041	70.9198	71.1553	70.9438	71.2843	73.3792	73.1357	75.2614	72.2972	73.9737	71.6325	72.6509	682.776	76.1141	71.8598	73.0293	72.4628	72.8149	72.1291	71.1199	69.2424	72.3822	70.7252	73.8499	73.4261	72.5181	74.1792	76.892	76.2109	77.0339	77.5954	78.8414
1433573_x_at	Prss2	99.1397	100.087	89.201	94.9324	97.143	92.5366	86.3766	95883.9	100.162	89.9872	101.125	98.8937	101.694	99.5755	100.188	101.981	101.295	108.124	100.655	100.972	100.943	102.086	102.255	103.373	101.605	102.208	101.526	92.4528	26902	102.238	104.87	102.496	100.547	101.48	102.285	96.0109	99.5441	101.429	101.02	102.321	102.242	101.625	102.272	135.392	125.527	104.65	130.652	105.9
1435507_x_at	Prss2	100.669	100.988	100.533	100.858	98.8351	101.046	100.206	21752.4	106.73	99.3628	100.692	100.663	101.353	100.552	91.1185	101.927	104.547	101.042	98.1585	96.2319	100.972	101.729	102.438	102.308	101.159	102.779	101.207	101.551	6988.94	103.026	101.452	102.041	97.3474	101.148	101.028	101.06	100.07	101.292	100.826	101.867	101.839	101.43	102.467	109.852	111.218	107.632	106	104.581
1417682_a_at	Prss2	89.3553	96.1876	86.5618	93.8299	82.7917	91.769	87.9264	90268.9	86.1943	66.2453	75.0997	100.682	98.3043	87.0304	90.367	103.194	92.9486	87.8466	99.6018	98.3867	96.0069	100.219	103.693	110.305	99.326	109.883	102.491	117.041	36822.3	140.487	122.519	106.383	101.732	104.064	106.146	98.5926	91.0682	99.9726	140.011	125.495	116.805	103.417	117.795	140.579	155.411	155.479	145.738	129.953
1433459_x_at	Prss2	93.2479	100.346	95.9704	96.5123	96.3866	92.5219	99.2396	74960.9	99.5603	98.4336	100.045	100.452	101.175	93.3682	99.0793	99.7315	102.426	99.6392	98.6399	100.355	100.321	104.993	101.053	104.836	100.35	105.82	100.408	101.35	22273.2	109.78	100.761	101.379	97.3474	105.309	102.285	98.9632	92.8186	99.604	100.377	101.692	103.533	101.014	105.658	123.089	109.869	113.352	115.741	119.923
1434803_a_at	Sycn	69.4771	71.9116	70.5486	70.7795	69.9239	70.6975	69.0075	4827.68	69.1351	68.4793	71.677	71.4468	72.8719	71.5821	70.6428	73.2134	72.8258	71.064	71.1863	70.9704	71.4687	73.1582	73.5474	75.5504	74.6912	73.9047	71.9247	72.9849	755.824	74.8754	71.9697	73.1779	71.5764	73.0774	72.3433	71.4085	70.6788	72.5512	71.066	73.7608	73.4585	72.8305	73.7429	76.1984	75.8528	76.5621	75.3419	76.646
1415954_at	Try4 /// Try5	68.9315	68.9245	69.9671	69.5663	65.0562	67.3874	66.8674	158762	69.3134	66.3397	69.3884	69.5965	70.697	69.2284	66.3565	70.9593	70.5761	69.484	68.9117	68.9166	69.8914	71.8458	70.9352	73.8106	70.0522	71.3867	69.5116	71.6138	62048.1	75.299	69.6073	70.8585	69.4554	70.5768	70.8332	69.8121	68.5651	70.1665	69.5381	71.2666	71.1483	70.1	71.8303	74.7251	73.1379	73.8731	74.1619	75.2148
1428358_at	Zg16	90.8399	95.8628	95.7312	96.2005	86.1302	90.6844	88.6082	3138.02	89.0731	88.0265	94.3949	95.8508	97.9788	98.3633	89.8158	97.6193	102.774	95.2964	95.6439	94.1038	95.0099	100.735	98.8453	103.239	96.9211	101.272	96.5798	97.3206	814.738	105.894	95.9188	100.412	94.4724	100.399	97.8291	94.7502	90.4063	96.8669	94.6533	100.494	97.6622	98.035	104.012	123.331	128.524	112.669	109.27	114.065
1434137_x_at	Zg16	177.737	154.759	139.764	171.55	135.068	161.894	164.682	46977.2	155.935	89.721	148.758	175.127	210.131	95.0587	137.555	179.002	171.592	174.58	169.516	175.773	150.301	164.272	178.71	250.488	179.732	184.303	177.865	210.424	16819.4	190.787	198.928	201.929	174.92	114.593	176.425	174.711	177.2	226.589	308.531	183.479	170.133	176.945	178.133	200.564	206.032	194.227	202.691	287.975
1428359_s_at	Zg16	64.0618	65.5152	64.8954	65.2909	62.1036	64.3295	64.0113	21852.7	61.3073	65.2614	65.0958	65.2047	66.2139	64.9824	63.429	66.5933	66.6082	64.714	65.0639	64.7373	65.3601	66.482	66.9513	67.8409	65.9518	66.7343	65.3861	66.3482	6264.56	68.8545	65.7719	66.7403	65.6676	67.4856	65.8058	65.4223	64.4945	66.2303	64.8146	66.9751	66.7774	66.1514	67.9394	70.6788	67.8374	69.8236	68.6153	69.2105
		CT18	CT19	CT20	CT21	CT22	CT23	CT24	CT25	CT26	CT27	CT28	CT29	CT30	CT31	CT32	CT33	CT34	CT35	CT36	CT37	CT38	CT39	CT40	CT41	CT42	CT43	CT44	CT45	CT46	CT47	CT48	CT49	CT50	CT51	CT52	CT53	CT54	CT55	CT56	CT57	CT58	CT59	CT60	CT61	CT62	CT63	CT64	CT65

## Sheet: WT-Restrictive
Probe Set	Genbank ID	Gene Symbol	GSM327055	GSM327101	GSM327102	GSM327103	GSM327104	GSM327105	GSM327106	GSM327107	GSM327108	GSM327109	GSM327110	GSM327111	GSM327112	GSM327113	GSM327114	GSM327115	GSM327116	GSM327117	GSM327118	GSM327120	GSM327122	GSM327125	GSM327128	GSM327129
1416055_at	NM_009669	Amy2a2 /// Amy2a5	167788	428.6	5693.5	197.4	2592.8	192.2	10083.9	332.6	685.7	148	776	186.1	469.2	4491.7	520	162.1	615.9	136.7	884.3	177.9	1963.8	279.1	502.5	476.5
1417257_at	BC006872	Cel	3775.9	65.1	71.4	63.9	64.1	64.4	63	64.7	63.9	64.2	63.8	64.3	63.6	136.6	66.6	64.4	63.3	63.6	65.7	65	65.7	66.3	67.4	67.4
1448281_a_at	NM_007919	Cela2a	28032	91.3	938.7	78	163.8	63.4	121.9	72.6	83.2	79.9	208.8	73.4	72.2	816.9	142.8	105.2	104.2	83.5	106.6	104.5	161.5	95.4	89.6	76.8
1415883_a_at	NM_026419	Cela3b	5537	44.3	68.1	44.2	44.4	47.9	45.5	44.7	44.6	44.7	44	44.2	44.6	44.8	47.9	44.7	44	44.2	45.3	45.1	45.4	45.4	46	46.1
1415884_at	NM_026419	Cela3b	5063.4	87.3	85.1	83.2	180.7	89.4	138.4	84.8	81.3	88.2	87.7	84.3	96.3	91.6	92.4	88.1	82.7	84.2	89.1	219.5	92.6	89.3	90.1	90.1
1435611_x_at	BI439657	Cela3b	6779.7	107.6	191.2	97.5	109.6	108.6	135.8	112.3	108.2	108.6	107.2	102.5	108.3	108.7	166.9	108.8	107.2	107.1	110.4	109.7	165.1	108.3	116.8	112.3
1435012_x_at	BI439550	Cela3b /// Gm13011 /// LOC638418	32143	97.5	1088.3	101	334.5	167.8	333.2	99.2	101.2	98.8	95.5	95.8	97.3	409	112.2	100.8	114.7	96.6	108.6	106	194.6	105.5	112.1	116.6
1437326_x_at	AV060902	Cela3b /// LOC638418	31487.5	113	916.8	128.9	155.9	123.8	322.1	117.4	113.1	117.1	139.3	111.7	111.1	202	129.7	113.4	111	109.8	121.6	122.3	131.9	122.5	128.9	127.5
1415805_at	NM_025469	Clps	4466.5	61.6	65.9	62.6	62.1	63.3	61.8	62.3	64.7	62.1	61.4	61.9	61.9	62.2	64.8	62	62.5	61.3	63.2	63.1	63.2	63.3	65.2	65.3
1438612_a_at	AV076302	Clps	6463.4	77.4	347	77	81.9	87.2	251.6	80.9	77.5	79.1	77.6	78	79.1	112.3	87.1	80.2	76.1	78.1	83.7	83.1	83.8	83.4	86	87.2
1428062_at	AK003088	Cpa1	7261.5	62.3	63.7	63	63.1	63.6	65.7	63.5	63.2	63.2	64.1	63.1	63.2	118	67	63.4	62.7	62.4	65.7	64.6	64.8	63.6	64.8	65.9
1454623_at	BG141511	Cpa2	555.3	57.1	58.2	57.3	57.4	59	56.3	57.7	56.9	57.7	56.6	57.5	57.5	57.8	60.2	57.9	56.7	56.8	59.2	58.9	59.4	59.4	61.9	60.8
1428102_at	AK003061	Cpb1	6965.7	62.7	151.5	62.3	63	64.4	89	63.3	62.4	61.9	72.8	61.8	63.1	178.8	64.9	63.1	62	61.9	71.7	63.5	65.1	64.4	65.1	65.7
1448220_at	NM_025583	Ctrb1	11253	67	227.3	65.1	66.1	66.3	82.1	67.5	67.5	67.4	65.9	65.5	66.8	202.7	68.2	65.8	66.9	65.6	68	67.8	67.5	67.6	68.7	68.4
1431763_a_at	AK003074	Ctrl	10137.6	65.5	488.8	65.8	66.5	65.7	129.5	66.2	69.4	66.1	65.3	65.8	64.9	281.7	68.1	65.9	66.7	65.2	67.4	66.8	68.6	66.9	68.3	69.4
1421868_a_at	NM_026925	Pnlip	2382.7	104	140.5	103.9	104.8	107.4	104.9	108	107.1	106.1	106.1	106.7	105.3	169.1	114.4	104.3	112.8	104.1	109.3	110.1	68.1	111.1	111.1	113.1
1433431_at	AI326372	Pnlip	17068.7	60	215.7	60.5	60.4	60.9	284.1	60.9	60.4	60.6	63.3	60.6	60.6	412.9	63.1	60.7	60	60	61.7	61.3	61.8	62.1	62.5	62.7
1415777_at	NM_018874	Pnliprp1	3122	78.4	84.9	74.6	79.4	79.1	73.7	79.9	78.3	79.7	77.5	78.3	78.9	79.3	81.5	78.6	78.1	82.1	80.4	80.2	80.5	80.7	100	84.4
1448186_at	NM_011128	Pnliprp2	866.1	78.5	81.9	78.2	79	82.5	77	80.3	78.1	80.1	77	80.5	80.4	79.3	85.6	80.9	77.4	78.4	82.1	82.7	83.6	83.4	86	85.8
1417682_a_at	NM_009430	Prss2	13828.7	100.4	274.7	130.6	209.6	109.7	203.5	135.9	129.8	140.2	125	136.4	162	321.1	176.4	143	203.8	116	196.5	162.9	280.9	161	181.3	169.7
1433459_x_at	BI348548	Prss2	19763.7	117.1	189.1	128.5	131.7	129.1	243.1	115.7	128.9	117	127.7	112	115.2	146	132.6	129	110	127	130.8	129.9	131	125.8	132.5	133
1433573_x_at	BI713841	Prss2	13344.1	120.9	125.7	121.3	130.6	124.9	201.3	112.6	124.7	122.3	130.8	124.9	121.8	170.3	129	125.1	123.5	123.5	126.1	126.6	103.9	122.6	128.6	129.6
1435507_x_at	BI348639	Prss2	3172.6	139.3	212.7	140.5	141.4	141.4	260.4	130.7	139.4	139.8	139.5	126.3	144.4	254.2	142.9	141.8	139.3	139.4	143	142.7	158.4	141.6	156.7	143.9
1434803_a_at	AV050299	Sycn	1050.7	80.4	107.5	78.1	86.3	95.7	81.2	82.3	81	83.1	80.9	82.3	81.8	82.2	86.6	83.3	80.1	77.5	85.3	84.9	86.9	85.1	87.1	89.4
1415954_at	AB009661	Try4 /// Try5	17432.3	93.6	526.3	102.7	111.9	107.2	674.8	105.9	105.5	105.4	107.2	93.9	103.1	849.5	110.9	102.3	104.9	103.7	133.1	108.1	121.4	106.6	111.1	109
1428358_at	BF581690	Zg16	1018.1	108.4	116.1	105.4	109.6	128.5	114	145.8	109	132.6	104.2	110.8	108.9	111.7	150.6	119.6	102.8	103.8	113.1	119.5	120.6	120.4	127.7	126.2
1428359_s_at	BF581690	Zg16	4656.6	72.8	101.2	71.5	71.6	94.9	84.4	72.7	71.4	72.1	70.4	71.8	73.2	74.2	78.6	73	71.3	72.5	88.3	75.4	76.1	76.1	78.7	78.6
1434137_x_at	BI792151	Zg16	6434	330	990.7	353.4	352.6	347.3	388	352.9	352.7	281.2	309.2	351	338.2	352.3	777.2	351.4	347.8	349.2	358.4	509.5	351.2	393.4	366.4	398.2
			CT24	CT25	CT26	CT27	CT28	CT29	CT30	CT31	CT32	CT33	CT34	CT35	CT36	CT37	CT38	CT39	CT40	CT41	CT42	CT43	CT44	CT45	CT46	CT47

## Sheet: WT-fasted
Probe Set	Genbank ID	Gene Symbol	GSM327154	GSM327155	GSM327156	GSM327157	GSM327158	GSM327162	GSM327163	GSM327164	GSM327165	GSM327166	GSM327167	GSM327168	GSM327169
1416055_at	NM_009669	Amy2a2 /// Amy2a5	145.5	142.9	131.6	153.1	130.6	145.8	41786.5	130.9	130.2	130.4	123.9	135.1	124.3
1417257_at	BC006872	Cel	76.6	76.1	75.5	77.2	76.8	99	404.6	74.5	74.8	75.7	75.6	76.2	75.9
1448281_a_at	NM_007919	Cela2a	91.9	88.2	87.4	89.2	92.7	88.5	6489.1	86.8	102.8	87.3	92.8	92.5	100
1415883_a_at	NM_026419	Cela3b	43.4	43.3	43.2	43.6	45.8	43.3	806.6	42.6	42.9	43.2	43.1	43.3	43.2
1415884_at	NM_026419	Cela3b	84.5	84.3	83.4	85.9	82.8	86.2	508.3	83.4	83.2	83.9	83.4	110.3	84.2
1435611_x_at	BI439657	Cela3b	84.5	84.3	84.1	84.6	83.7	84.3	974.8	82.9	83.5	84	83.9	84.3	84.2
1435012_x_at	BI439550	Cela3b /// Gm13011 /// LOC638418	106.2	100.6	97.7	102.9	98	102.4	5532.9	95.7	96.8	96.9	98.5	100.5	99.6
1437326_x_at	AV060902	Cela3b /// LOC638418	103.5	102.4	101	104.6	99.8	110.7	3930.4	159.5	100	100.7	101.3	103.6	109.1
1415805_at	NM_025469	Clps	59.8	59.6	59.3	60.7	58.8	59.9	625	58.7	58.7	59.6	59.4	59.6	59.5
1438612_a_at	AV076302	Clps	81.4	80	79.8	81.4	79.5	83.4	986	76.8	77.3	78.3	79.1	79.7	79.1
1428062_at	AK003088	Cpa1	58.7	58.5	58.1	59.4	57.9	58.9	1660.5	57	57.8	58.8	58.1	58.6	58.4
1454623_at	BG141511	Cpa2	57	56.8	56.4	57.6	56.1	57	92.2	55.3	55.8	56.3	56.3	56.7	56.6
1428102_at	AK003061	Cpb1	61.7	61.5	60.8	62.2	60.9	62.1	1876.3	59.8	60.5	61.2	61.1	63.2	61.4
1448220_at	NM_025583	Ctrb1	55.4	55.2	55	55.5	68.8	55.3	590.7	53.9	54.9	54.7	54.8	55.1	55
1431763_a_at	AK003074	Ctrl	58	57.8	57.4	58.9	57.3	58	1557.7	62.7	57.2	57.5	57.5	57.9	57.7
1421868_a_at	NM_026925	Pnlip	79.4	78.9	77.5	80.3	76.9	79.9	738.5	76.1	76.5	77.6	77.9	78.8	78.3
1433431_at	AI326372	Pnlip	53.2	54.5	52.8	53.9	52.6	53.3	3812.5	53.5	56.9	52.9	52.7	53.2	53
1415777_at	NM_018874	Pnliprp1	77	76.6	76.4	77.3	76.5	79.4	185	75.1	74.7	76.3	77.6	76.7	76.6
1448186_at	NM_011128	Pnliprp2	82.7	81.9	79.5	83.5	80.3	83	183.5	81.5	79.4	80.6	81.8	82.1	81
1417682_a_at	NM_009430	Prss2	153.5	151.1	94.1	157.2	177.8	174.2	3257.1	138.9	139	164.1	185.3	150.1	142.1
1433459_x_at	BI348548	Prss2	120.1	119.1	116.4	120.7	119	122.6	2541.2	114.7	118.9	119.3	119.3	119.7	115.6
1433573_x_at	BI713841	Prss2	120.9	120.3	111	116.8	121.9	122.5	975.3	121.5	141.5	131.9	122	120.3	164.3
1435507_x_at	BI348639	Prss2	117.7	117.4	117.1	118.2	116.4	117.2	758.7	115.8	116.8	117.2	116.9	119.3	117.3
1434803_a_at	AV050299	Sycn	83.1	82.5	79	83.8	81	82.4	150.9	80.1	80.4	81.2	81.5	91.6	82.1
1415954_at	AB009661	Try4 /// Try5	77.4	76.8	76	78.3	76	80.3	3289.4	75.2	76.4	76.8	76.4	89.7	76.1
1428358_at	BF581690	Zg16	114.6	110.4	108	113.3	109.4	119.6	2777.9	108.2	109.2	109	110	114.3	109.9
1428359_s_at	BF581690	Zg16	69.7	69.2	68.9	70.2	67.8	73.7	7583.3	67.6	67.1	68.6	68.8	69.3	69.4
1434137_x_at	BI792151	Zg16	236.6	244.9	226.9	244.7	242.9	590.3	7572.5	297.3	255.1	365.6	428.8	254.1	416.2
			CT2	CT4	CT6	CT8	CT10	CT36	CT38	CT40	CT42	CT43	CT44	CT45	CT46

## Sheet: WT-fasted-Refed
Probe Set	Genbank ID	Gene Symbol	GSM327154	GSM327155	GSM327159	GSM327160	GSM327161
1416055_at	NM_009669	Amy2a2 /// Amy2a5	145.5	142.9	138.9	21017.6	137.2
1417257_at	BC006872	Cel	76.6	76.1	77.1	690.8	76.1
1448281_a_at	NM_007919	Cela2a	91.9	88.2	89.1	2993.8	86.6
1415883_a_at	NM_026419	Cela3b	43.4	43.3	43.6	272.7	46.5
1415884_at	NM_026419	Cela3b	84.5	84.3	84.4	285.9	84.3
1435611_x_at	BI439657	Cela3b	84.5	84.3	85	640.9	84.4
1435012_x_at	BI439550	Cela3b /// Gm13011 /// LOC638418	106.2	100.6	103.5	2755	100.1
1437326_x_at	AV060902	Cela3b /// LOC638418	103.5	102.4	98.4	1947.4	101.7
1415805_at	NM_025469	Clps	59.8	59.6	60.1	379.7	59.7
1438612_a_at	AV076302	Clps	81.4	80	80.9	698.3	79.3
1428062_at	AK003088	Cpa1	58.7	58.5	59.2	1164.5	58.5
1454623_at	BG141511	Cpa2	57	56.8	57.4	57.1	56.7
1428102_at	AK003061	Cpb1	61.7	61.5	62.2	1276.8	61.5
1448220_at	NM_025583	Ctrb1	55.4	55.2	55.7	1209.4	55.1
1431763_a_at	AK003074	Ctrl	58	57.8	58.3	536.6	57.8
1421868_a_at	NM_026925	Pnlip	79.4	78.9	80.1	295.1	83
1433431_at	AI326372	Pnlip	53.2	54.5	53.7	2421.9	53.1
1415777_at	NM_018874	Pnliprp1	77	76.6	77.4	183.2	76.7
1448186_at	NM_011128	Pnliprp2	82.7	81.9	83.2	98.3	81.6
1417682_a_at	NM_009430	Prss2	153.5	151.1	154	1682.7	147.6
1433459_x_at	BI348548	Prss2	120.1	119.1	121.1	1201.1	119.9
1433573_x_at	BI713841	Prss2	120.9	120.3	121.7	433.5	120.2
1435507_x_at	BI348639	Prss2	117.7	117.4	118.3	530.2	115.3
1434803_a_at	AV050299	Sycn	83.1	82.5	83.4	100.8	82.3
1415954_at	AB009661	Try4 /// Try5	77.4	76.8	77.9	1351	76.8
1428358_at	BF581690	Zg16	114.6	110.4	113.2	161.4	110.4
1428359_s_at	BF581690	Zg16	69.7	69.2	70	537.4	69.2
1434137_x_at	BI792151	Zg16	236.6	244.9	240.3	431.4	232.2
			CT2	CT4	CT6	CT8	CT10

## Sheet: CrysKO-AdLibitum
Probe Set	Genbank ID	Gene Symbol	GSM327130	GSM327131	GSM327132	GSM327133	GSM327134	GSM327135	GSM327136	GSM327137	GSM327138	GSM327139	GSM327140	GSM327141
1416055_at	NM_009669	Amy2a2 /// Amy2a5	108.2	100.1	102.9	103.3	114	111.8	100.5	101	107.5	104.1	102.6	109.9
1417257_at	BC006872	Cel	141.2	139.3	253.4	171.4	142.4	119.8	138.2	146.6	164.3	142.4	139.8	163
1448281_a_at	NM_007919	Cela2a	105.7	137.1	115.3	103.2	108	120.9	146	199	131.3	134.1	102.1	105.5
1415883_a_at	NM_026419	Cela3b	57.3	56.5	56.8	56.9	59.6	56.9	56.4	56.7	57.2	57.7	56.3	57.1
1415884_at	NM_026419	Cela3b	406.1	247.8	167.6	382.3	162.2	163.2	152.6	215.6	120.3	123.4	190.2	299.7
1435611_x_at	BI439657	Cela3b	71.6	84.7	70.9	71.2	71.4	72	70.9	71.6	71.4	71.3	70.4	71.3
1435012_x_at	BI439550	Cela3b /// Gm13011 /// LOC638418	99	94.1	94.7	96.4	101.5	109.5	94.2	226.9	96.1	97.4	94.2	103.3
1437326_x_at	AV060902	Cela3b /// LOC638418	98.2	94.5	97.3	97.1	107.1	97	96.7	95.4	97.7	97.8	96	99.1
1415805_at	NM_025469	Clps	70	69.3	69.6	69.7	69.7	70.1	69.5	69.6	69.9	69.6	69.3	69.8
1438612_a_at	AV076302	Clps	86.2	81.8	80.8	82.7	86.6	82.3	81.2	82.2	83.2	83.5	82	84.7
1428062_at	AK003088	Cpa1	67.6	66.7	67.2	67.3	68.6	67.3	67.1	67.2	68.1	67.7	66.9	67.3
1454623_at	BG141511	Cpa2	68.6	65.6	65.3	66.4	67.2	66.3	65.9	65.8	66.7	66.7	65.7	66.9
1428102_at	AK003061	Cpb1	77.5	69.4	69.8	70.7	70.8	70	69.7	69.9	70.3	70.5	69.4	76.8
1448220_at	NM_025583	Ctrb1	71.6	88.8	73.1	71.2	71.4	71.5	71.3	71.4	71.5	72.4	70.9	71.8
1431763_a_at	AK003074	Ctrl	68.5	67.1	68.2	118.7	68	67.9	170.3	80.9	68.2	121.6	67.2	67.8
1421868_a_at	NM_026925	Pnlip	103.4	81.4	82.2	133.4	82.8	107.6	87.4	81.5	82.6	82.5	81.6	84.4
1433431_at	AI326372	Pnlip	67.8	66.9	66.7	67.4	68.4	67.4	67.2	67.1	67.8	67.6	66.8	67
1415777_at	NM_018874	Pnliprp1	278.7	87.3	86.8	89.8	88.8	88.1	87.3	87.4	92	88.2	86.7	88.1
1448186_at	NM_011128	Pnliprp2	83.8	81.1	81.4	135.2	85	82.1	81	81.6	83.1	82.9	81.2	81.6
1417682_a_at	NM_009430	Prss2	426.4	121	138.5	144.2	163	226.6	175.2	130.8	186	145.9	237.9	213.3
1433459_x_at	BI348548	Prss2	118.9	107	104.3	105.1	115	105	104.6	105	106.8	106.6	103.9	109.3
1433573_x_at	BI713841	Prss2	111.9	106.9	102.2	107.6	159.9	118.6	99.6	119.9	108.3	107.6	101.9	107.4
1435507_x_at	BI348639	Prss2	105.1	102.6	104.3	109.2	104.1	103.5	103	102.4	104.1	116.3	102.9	126.7
1434803_a_at	AV050299	Sycn	91.3	80.6	81.6	83.3	83.9	82.9	82.7	95.9	94.9	83.5	81.7	127.1
1415954_at	AB009661	Try4 /// Try5	84.6	81.4	81.6	82.6	82.5	82.2	77.8	80.5	82.7	82.7	81.2	82.8
1428358_at	BF581690	Zg16	133.7	109.4	111.7	111.7	121.5	112.3	105.9	109	124.4	117.2	108.6	121.9
1428359_s_at	BF581690	Zg16	80	77.9	78.4	82.8	80.4	88.4	77.9	183.5	79.8	97.3	78.3	97.9
1434137_x_at	BI792151	Zg16	169.2	144.9	164.1	115.3	123.7	115.1	115	111.9	120.6	117.1	114.3	181
			CT24	CT26	CT28	CT30	CT32	CT34	CT36	CT38	CT40	CT42	CT44	CT46

## Sheet: CrysKO-Restrictive
Probe Set	Genbank ID	Gene Symbol	GSM327142	GSM327143	GSM327144	GSM327145	GSM327146	GSM327147	GSM327148	GSM327149	GSM327150	GSM327151	GSM327152	GSM327153
1416055_at	NM_009669	Amy2a2 /// Amy2a5	99	105.4	100.2	100.1	101.1	99.1	128.4	100.3	37267	94.1	112.4	95.6
1417257_at	BC006872	Cel	139.2	118.5	139.2	118.1	137.8	137.5	167.1	135.8	3054.9	137.3	142.3	138
1448281_a_at	NM_007919	Cela2a	128.2	110.4	101.1	96.7	104.4	103.5	104	100	21792.4	266.6	107	257.1
1415883_a_at	NM_026419	Cela3b	56.5	56.5	56.1	55.9	56.7	56.6	56.8	56.5	6342.3	55.7	61.1	55.7
1415884_at	NM_026419	Cela3b	132.7	148.8	122.4	124.9	118.6	122.2	117	150.4	1711.6	166	223.5	131.8
1435611_x_at	BI439657	Cela3b	70.3	68.1	70.6	70.3	70.8	70.6	71	70.5	7083.1	70.1	79.9	70.4
1435012_x_at	BI439550	Cela3b /// Gm13011 /// LOC638418	92.2	92.4	93.7	105.7	93.3	92.9	93.8	91.5	31468.7	89.6	104.5	91.2
1437326_x_at	AV060902	Cela3b /// LOC638418	93.6	93.1	96.3	95.9	94.7	94.4	117.3	92.5	21829	91	100.8	92.8
1415805_at	NM_025469	Clps	69.2	69.3	69.1	68.8	69.4	69.3	69.7	69.4	3222.7	68.6	71.9	68.9
1438612_a_at	AV076302	Clps	81.9	79.2	82	81.2	81.5	82	80.6	78.6	3890.4	81.5	86.8	78.8
1428062_at	AK003088	Cpa1	69	66.9	66.6	66.2	80.6	66.8	67	66.7	7260.4	65.8	68.6	66.3
1454623_at	BG141511	Cpa2	65.4	64.5	65.5	64.9	65.6	64.8	66.1	65	552.8	64.6	69	63.2
1428102_at	AK003061	Cpb1	69.4	69.3	69.3	69.1	69.4	69.4	69.9	69.2	12102.6	68.8	73.1	69.4
1448220_at	NM_025583	Ctrb1	70.4	69.3	71	69	71.2	69.9	71.3	71.1	14075.6	69	71.9	70.9
1431763_a_at	AK003074	Ctrl	67.8	67.1	68.6	68.8	67.3	67.1	72.7	68.7	4255.8	66.5	69	67.1
1421868_a_at	NM_026925	Pnlip	80.7	78.5	108.1	80	81.2	79.6	81.4	83.5	6260.3	78.6	90.4	131.6
1433431_at	AI326372	Pnlip	66.5	66.8	67	74.5	67.1	68.5	67	66.8	20981.7	68	68.3	72.8
1415777_at	NM_018874	Pnliprp1	87.1	86.9	87.2	83.3	87.5	87.2	98.3	87.4	1114.5	86.9	90.4	93.1
1448186_at	NM_011128	Pnliprp2	79.6	79.9	80.5	81.2	81.3	80.4	80.5	81.3	607.4	79	86.8	82.6
1417682_a_at	NM_009430	Prss2	111.8	116.6	91.3	120.6	135.3	102.5	125.3	117.6	10525	112.2	173.4	130.4
1433459_x_at	BI348548	Prss2	98.7	104.6	99	97.1	104.7	104.2	104.8	95.4	8334.3	103.6	119.9	95.9
1433573_x_at	BI713841	Prss2	96.8	127.6	98.6	93	99.7	118.4	157.6	108.1	8465.2	89.6	119	107
1435507_x_at	BI348639	Prss2	101.1	102.5	102.7	97.1	103.1	102.6	103.3	102.5	3249.2	102.1	105.1	102.4
1434803_a_at	AV050299	Sycn	79.9	79.6	80.4	81.2	82.4	82.2	81.7	79.8	365.4	118.3	87	79.4
1415954_at	AB009661	Try4 /// Try5	80.7	80.4	79.4	79.8	81.7	80.5	81.4	78.5	7981.9	79.4	84.8	82.3
1428358_at	BF581690	Zg16	107.1	109.2	109.7	106.6	156.4	123.3	109.1	105.3	898.9	102.4	235.5	110.5
1428359_s_at	BF581690	Zg16	77.7	77.9	78.3	76.3	80.9	77.9	78.2	77.8	1937.5	75	81.2	77.8
1434137_x_at	BI792151	Zg16	114.5	111.5	109.2	113.6	112.7	109.2	114.8	113.9	3141.9	104.6	118.8	118.5
			CT24	CT26	CT28	CT30	CT32	CT34	CT36	CT38	CT40	CT42	CT44	CT46
