# Supplementary material for: Circadian Rhythms of Fetal Liver Transcription Persist in the Absence of Canonical Circadian Clock Gene Expression Rhythms In Vivo
Source: PLoS One. 2012 Feb 23;7(2):e30781. doi: 10.1371/journal.pone.0030781 (PMC3285613; doi:10.1371/journal.pone.0030781)
Supplement: Table S6 — Primers for semi-quantitative and real-time RT-PCR with corresponding GenBank accession numbers. All PCR amplicons, except where noted, were verified by cloning and sequencing. (XLS) [file pone.0030781.s013.xls]

## Sheet: Sheet1
ID	Primer name	Sequence	Note
NM_007393	Actb-F	gtccctcaccctcccaaaag
	Actb-R	gctgcctcaacacctcaaccc
NM_001160150-2	Amy2a2-4-F	tgggacatggagatgagtga	Recognize Amy2a2-4.
	Amy2a-4-R	gatgagccagcaacatagca
NM_001042711	Amy2a5-F	gtggtcaatggtcagccttt	Recongize Amy2a2-5
	Amy2a5-R	ttgccatcgaccttatctcc
BC006872	Cel-F	acaatggtggcctttgagac
	Cel-R	cgtactggaggtcatcagca
NM_007919	Cela2a-F	cagaggtggaactcccaaaa
	Cela2a-R	ccagcctgtgacatagcaga
NM_026419	Cela3b-F	acggagcaccctgttacatc
	Cela3b-R	cacaccatggtcgtcttcac
NM_025469	Clps-F	agatgctgccaacatgacac
	Clps-R	tgccatagttggtgttggtg
AK003088	Cpa1-F	cagccagggcatcaagtatt
	Cpa1-R	gcctaaatggggctaaggag
AK003061	Cpb1-F	tatggcccaggagctacaac
	Cpb1-R	tgactgcaagcattgtctcc
NM_025583	Ctrb1-F	gaactggcttccatttctgc
	Ctrb1-R	atgtcattacgcacggtgaa
NM_023182	Ctrl-F	taacaccggcttccacttct
	Ctrl-R	gcgttccagttagggtgtgt
NM_026925	Pnlip-F	agaggacctttggagccatt
	Pnlip-R	acccacagtctggctcattc
NM_018874	Pnliprp1-F	ccagccactaaaaggcagag
	Pnliprp1-R	agcaggaagcgagtgttgat
NM_011128	Pnliprp2-F	tccagcacaatgactgcttc
	Pnliprp2-R	gcgaccaagatgtacccact
NM_009430	Prss2-F	cctggacaatgacatcatgc	Amplicon incorrect
	Prss2-R	tcaacacactggagcaggtc
NM_001003405	Try5-F	attgctacaaaacccgcatc	Amplicon incorrect
	Try5-R	actctggcattgagggtcac
NM_026716	Syncollin-F	ccaggtactgacctgcccta
	Syncollin-R	ggaccagtctccaaagatgc
NM_026918	Zg16-L	tgatcttcgtgacggacaag
	Zg16-R	tgggtttcattcagcaagtg
